# Supplementary material
Source: PubMed Central journal article supplement (PMC4199390)
Supplement: NIHMS613264-supplement-1.pdf [file NIHMS613264-supplement-1.pdf]

## Efficient CRISPR/Cas9-mediated genome editing in *P. falciparum*

Jeffrey C. Wagner<sup>1</sup>, Randall J. Platt<sup>1,2</sup>, Stephen J. Goldfless<sup>1</sup>, Feng Zhang<sup>1,2,3,4</sup>, Jacquin C. Niles<sup>1</sup>

<sup>1</sup>Department of Biological Engineering, Massachusetts Institute of Technology, Cambridge, Massachusetts, USA; <sup>2</sup>Broad Institute of Massachusetts Institute of Technology and Harvard, Cambridge, Massachusetts, USA; <sup>3</sup>McGovern Institute for Brain Research, Massachusetts Institute of Technology, Cambridge, Massachusetts, USA; <sup>4</sup>Department of Brain and Cognitive Sciences, Massachusetts Institute of Technology, Cambridge, Massachusetts, USA; Correspondence to: Jacquin C. Niles (jcniles@mit.edu)

### **List of supplementary information**

- Supplementary Figure 1.** *In vitro* assay to assess cleavage activity of selected sgRNA-T sequences
- Supplementary Figure 2.** Independent experiment to reproduce *kahrp* locus editing in 3D7 parasites
- Supplementary Figure 3.** CRISPR/Cas9-mediated editing of the *P. falciparum* *eba-175* locus
- Supplementary Figure 4.** Assessing the fate of *kahrp*-sgRNA-T-induced cleavage of the *kahrp* locus in the absence of a homologous donor plasmid
- Supplementary Table 1.** Summary of primer and sgRNA sequences used in this study

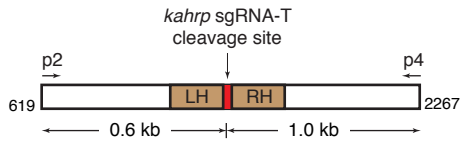

*kahrp* sgRNA-T

|   |              | DNA target |              | sgRNA-T |
|---|--------------|------------|--------------|---------|
| + | -            | +          | +            |         |
| - | <i>kahrp</i> | pUC19      | <i>kahrp</i> |         |

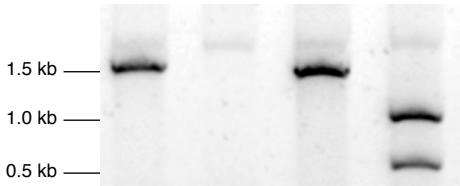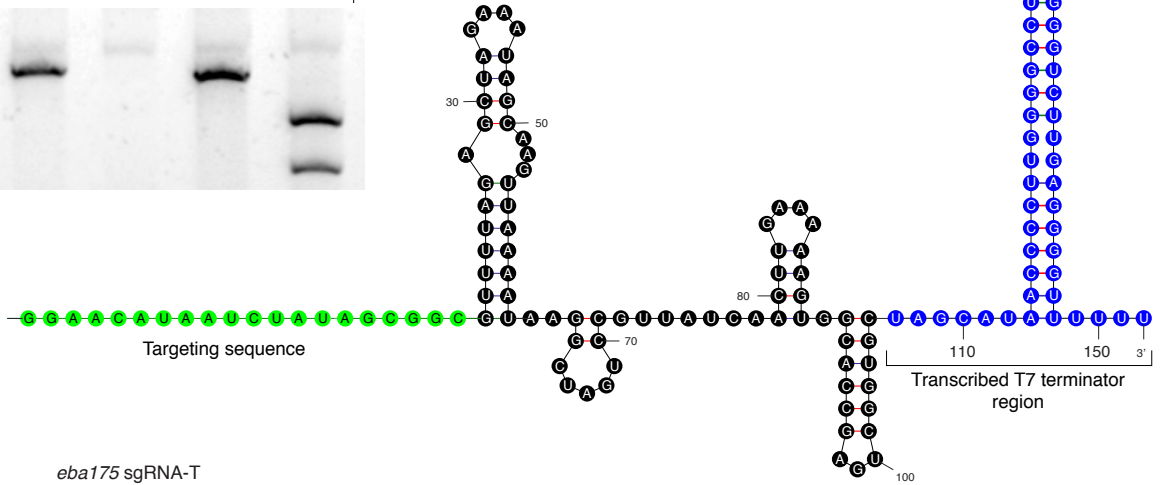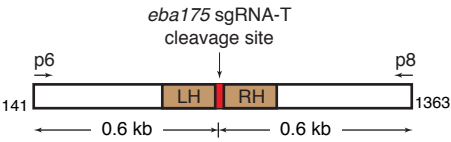

*eba175* sgRNA-T

|   |       | DNA target    |   | sgRNA-T |
|---|-------|---------------|---|---------|
| + | +     | +             | + |         |
| - | pUC19 | <i>eba175</i> |   |         |

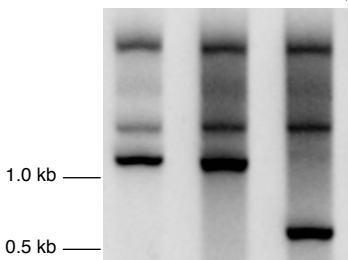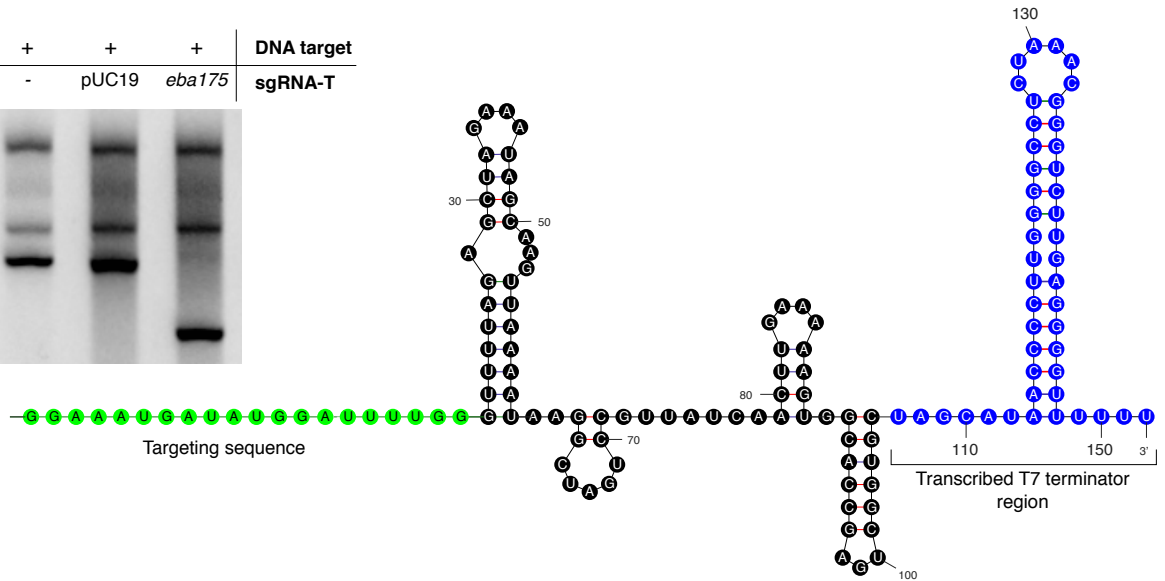

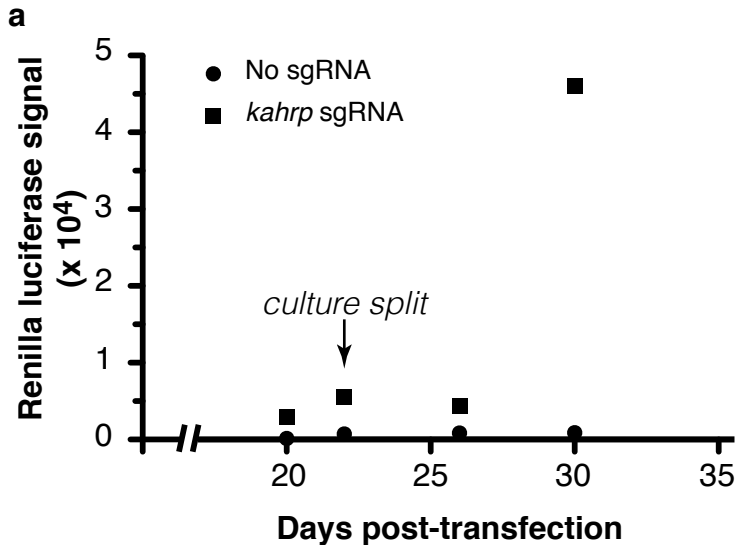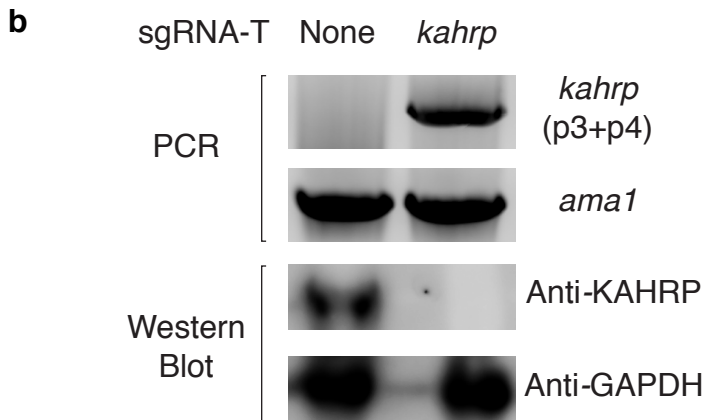

# Supplementary Figure 3

**a**

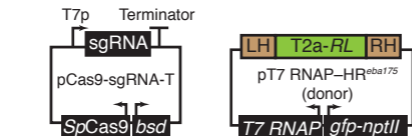

pCas9-*eba175* sgRNA (test)  
pCas9-pUC19 sgRNA (control)

***eba175* sgRNA sequence:**

<sup>742</sup>GGAAATGATATGGATTTTGGAGG<sup>764</sup>

**b**

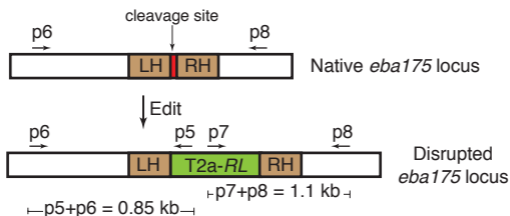

**c**

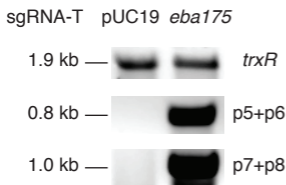

**d**

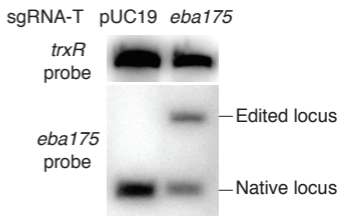

**e**

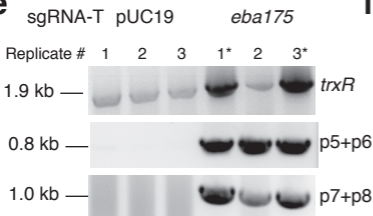

**f**

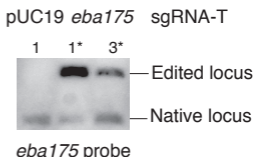

# Supplementary Figure 4

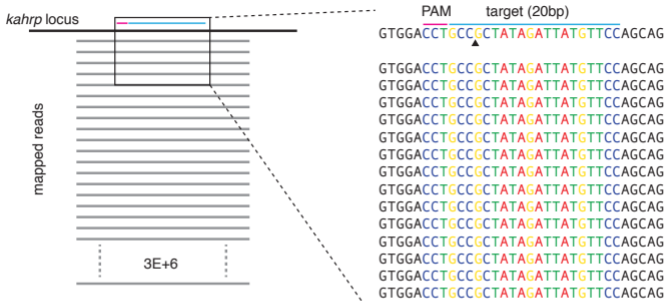

|          | Mutation          | sgRNA- <i>kahrp</i> | sgRNA- <i>pUC</i> |
|----------|-------------------|---------------------|-------------------|
| Missense | # indels          | 38                  | 26                |
|          | Mean indel length | -2.4                | -2.1              |
|          | Length StDev      | 3.4                 | 4.6               |
| Sense    | # indels          | 1394                | 1179              |
|          | Mean indel length | -0.9                | -1.0              |
|          | Length StDev      | 1.0                 | 0.9               |
|          | # Reads           | 3.6E+6              | 3.1E+6            |
|          | Indel frequency   | 3.9E-4              | 3.9E-4            |

**Supplementary Table 1. Summary of primer and sgRNA sequences used in this study.**

| <b>Description</b>                          | <b>Sequence</b>                                                  | <b>Notes</b>                                                          |
|---------------------------------------------|------------------------------------------------------------------|-----------------------------------------------------------------------|
| <b>sgRNA targeting sequences</b>            |                                                                  |                                                                       |
| <i>eba175</i>                               | ggaaatgatatggatttgg                                              |                                                                       |
| <i>kahrp</i>                                | ggaacataatctatagcggc                                             |                                                                       |
| <i>pUC19</i> control                        | gggactcaaccaagtcattc                                             |                                                                       |
| <b><i>kahrp</i> locus PCR confirmation</b>  |                                                                  |                                                                       |
| <i>p1</i>                                   | aacatgctgccataaataagaag                                          | RLuc internal-Reverse<br><i>kahrp</i> upstream of homologous region-  |
| <i>p2</i>                                   | caaaagcaacatgaacacca                                             | Forward                                                               |
| <i>p3</i>                                   | agacatgtaccacatgtggaggtagtggtgaaggtagagg                         | RLuc internal-Forward<br><i>kahrp</i> downstream of homologous        |
| <i>p4</i>                                   | gctcctgtagttgaacctgc                                             | region-Reverse                                                        |
| <b><i>eba175</i> locus PCR confirmation</b> |                                                                  |                                                                       |
| <i>p5</i>                                   | aacatgctgccataaataagaag                                          | RLuc internal-Reverse<br><i>eba175</i> upstream of homologous region- |
| <i>p6</i>                                   | gaaatatggaaatgttcaaaaaactg                                       | Forward                                                               |
| <i>p7</i>                                   | gatgaatggcctgatattgaagaag                                        | RLuc internal-Forward<br><i>eba175</i> downstream of homologous       |
| <i>p8</i>                                   | ctaaatcaatatgttcacgctttcc                                        | region-Reverse                                                        |
| <b><i>trxR</i> control</b>                  |                                                                  |                                                                       |
| Forward                                     | aaatatatacacacacctaataacttacaagtatcctaggaaa<br>aatgaacaatgtaattt |                                                                       |

Reverse                    tttaatctattattaaataaaattaaatgggggtacccgcggttatc  
cacattttccacccc

**Target DNA synthesis for *in vitro*  
*Sp* Cas9 cleavage assay**

|                        |                            |                   |
|------------------------|----------------------------|-------------------|
| <i>kahrp</i> _Forward  | caaaagcaacatgaacacca       | Same as <i>p2</i> |
| <i>kahrp</i> _Reverse  | gctcctgtagtgaacctgc        | Same as <i>p4</i> |
| <i>eba175</i> _Forward | gaaatattggaaatgtcaaaaaactg | same as <i>p6</i> |
| <i>eba175</i> _Reverse | ctaaatcaatattgttcacgctttcc | same as <i>P8</i> |

**qPCR primers**

|              |                      |
|--------------|----------------------|
| BSD_Forward  | gctgtccatcactgtccttc |
| BSD_Reverse  | tggcaacctgacttgtatcg |
| RLuc_Forward | agacaagatcaaggccatcg |
| RLuc_Reverse | accattttctcgcctcttc  |

**Probe synthesis for Southern blot  
analysis**

|                        |                                                                    |
|------------------------|--------------------------------------------------------------------|
| <i>kahrp</i> _Forward  | gtgttaaagaaaaggagaaaagc                                            |
| <i>kahrp</i> _Reverse  | ctgcagtagtacttgccttttag                                            |
| <i>eba175</i> _Forward | caaaatattgtgattgtaacatac                                           |
| <i>eba175</i> _Reverse | atcattttgtttattcctgtg                                              |
| <i>trxR</i> _Forward   | aaatatatacacacactaaaacttacaagtatcctaggaaa<br>aatgaacaatgtaattt     |
| <i>trxR</i> _Reverse   | tttaatctattattaaataaaattaaatgggggtacccgcggttatc<br>cacattttccacccc |
